# Supplementary material for: Effect of graphene oxide (GO) nanosheet sizes, pinhole defects and non-ideal lamellar stacking on the performance of layered GO membranes: an atomistic investigation
Source: Royal Society of Chemistry journal article supplement (doi:10.1039/c9na00235a), 2019-01-01
Supplement: c9na00235a1.pdf [file c9na00235a1.pdf]

# **Role of graphene oxide (GO) nanosheet sizes, pinhole defects and non-ideal lamellar stacking on the performance of layered GO membranes: An atomistic investigation**

Abhijit Gogoi, Aditya Koneru, and K. Anki Reddy\*

E-mail: anki.reddy@iitg.ac.in

## **OPLS-AA Force Field**

In OPLS-AA force field<sup>1</sup> the following bonded interactions are considered.

- Bond Stretching

$$V_b(r_{ij}) = k_{ij}^b (r_{ij} - b_0)^2 \quad (1)$$

The bond stretching interaction between atoms  $i, j$  is given by  $V_b(r_{ij})$  which is modeled through Eq. 1. Here  $b_0$  is the equilibrium bond distance between atoms  $i, j$  and  $r_{ij}$  is the instantaneous bond distance between them.  $k_{ij}^b$  is the spring constant of the bond between  $i$  and  $j$ .

- Bond-angle bending

$$V_a(\theta_{ijk}) = k_{i,j,k}^\theta (\theta_{ijk} - \theta_{ijk}^0)^2 \quad (2)$$

The bond-angle bending interaction  $V_a(\theta_{ijk})$  between the three atoms  $i$ ,  $j$  and  $k$  which are bonded through two bonds is given by Eq. 2.  $\theta_{ijk}$  is the instantaneous bond angle between  $i$ ,  $j$ ,  $k$  with  $j$  being the central atom.  $\theta_{ijk}^0$  is the equilibrium bond angle and  $k_{i,j,k}^\theta$  is the corresponding force constant.

- Torsional Interaction

$$V_d(\phi_{ijkl}) = \frac{V_1}{2} [1 + \cos(\phi + f_1)] + \frac{V_2}{2} [1 - \cos(2\phi + f_2)] + \frac{V_3}{2} [1 + \cos(3\phi + f_3)] \quad (3)$$

The torsional interaction  $V_d(\phi_{ijkl})$  due to the torsional angle  $\phi_{ijkl}$  between the planes containing the atoms with indices  $i, j, k$  and  $j, k, l$  is given by Eq. 3 where  $V_i$ , ( $i = 1, 2, 3...$ ) is the corresponding Fourier coefficients for torsional energy functions.

The non-bonded interactions in the present simulation are van der Waals interaction and Coulomb interaction.

- van der Waals interaction

$$V_{\text{LJ}}(r_{ij}) = \frac{C_{ij}^{(12)}}{r_{ij}^{(12)}} - \frac{C_{ij}^{(6)}}{r_{ij}^{(6)}} \quad (4)$$

In this present work the van der Waals interaction is modeled through Lennard-Jones (LJ) potential given by Eq. 4. The parameters  $C_{ij}^{(12)} = 4\epsilon_{ij}\sigma_{ij}^{(12)}$  and  $C_{ij}^{(6)} = 4\epsilon_{ij}\sigma_{ij}^{(6)}$  depend



on the pair of atom types. For the interactions with different atom types the following combination rules are applied

$$C_{ij}^{(6)} = \left( C_{ii}^{(6)} C_{jj}^{(6)} \right)^{1/2} \quad (5)$$

$$C_{ij}^{(12)} = \left( C_{ii}^{(12)} C_{jj}^{(12)} \right)^{1/2} \quad (6)$$

$$\epsilon_{ij} = \left( \epsilon_{ii} \epsilon_{jj} \right)^{1/2} \quad (7)$$

$$\sigma_{ij} = \left( \sigma_{ii} \sigma_{jj} \right)^{1/2} \quad (8)$$

In the above expression  $\epsilon_{ij}$  is the potential well depth and  $\sigma_{ij}$  is the distance where potential equals zero.

- Coulomb interaction

$$V_C(r_{ij}) = \frac{1}{4\pi\epsilon_0} \frac{q_i q_j}{\epsilon_r r_{ij}} \quad (9)$$

Here  $\epsilon_0$  and  $\epsilon_r$  are the vacuum and relative dielectric permittivities, respectively.

## GO nanosheet

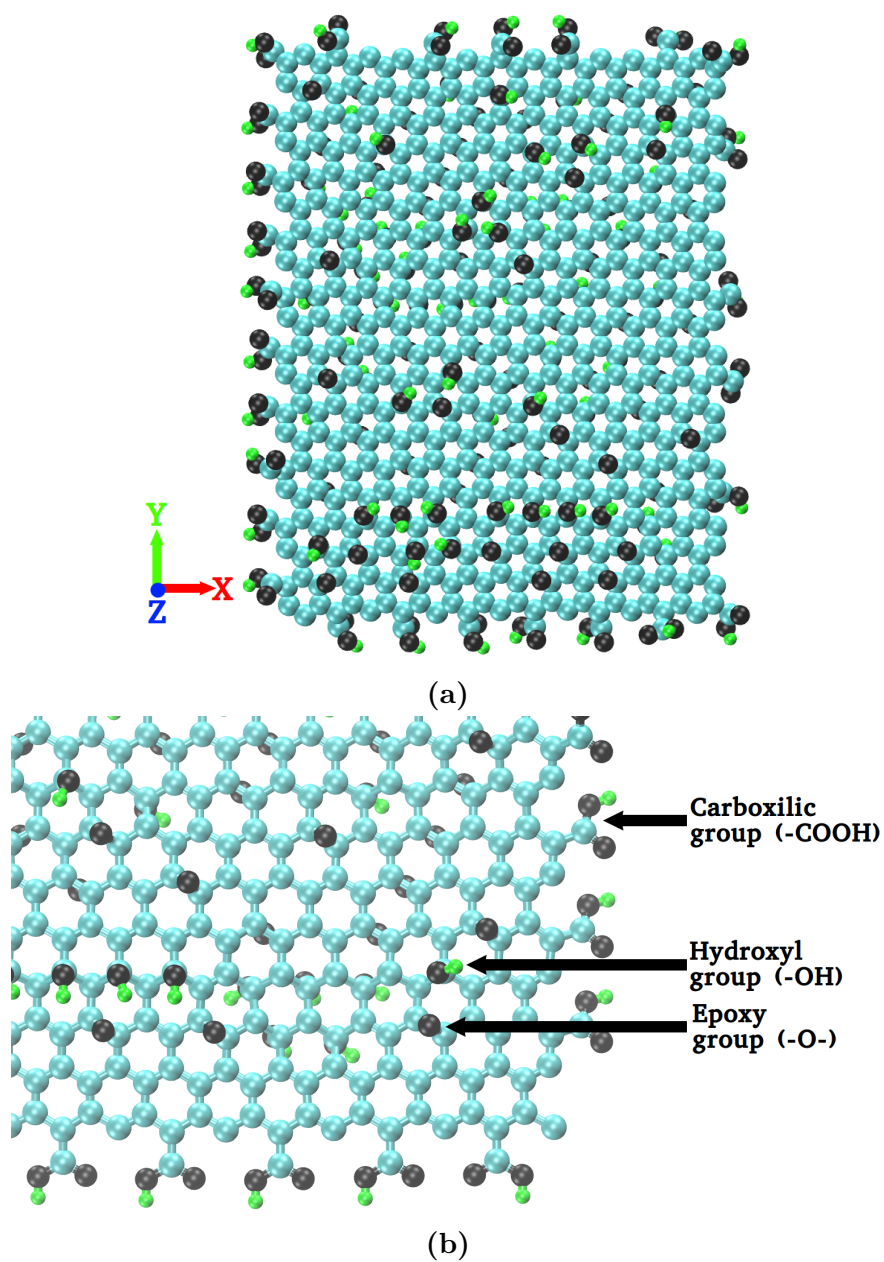

**Fig. S1.** (a) GO nanosheet. (b) The distribution of functional groups on GO nanosheet. The green color is for hydrogen atoms, the black color is for oxygen atoms and the cyan color is for carbon atoms.

## Hydrated layered GO membrane with non-ideal lamellar stacking

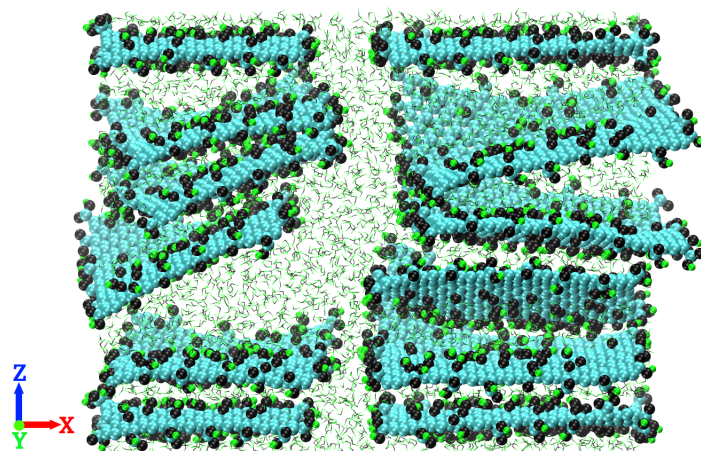

**Fig. S2.** Hydrated layered GO membrane of configuration 0-NP-nIL.

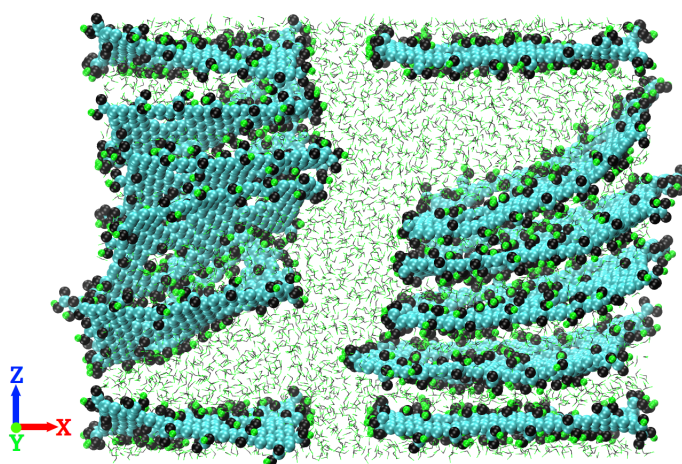

**Fig. S3.** Hydrated layered GO membrane of configuration 0-P-nIL.

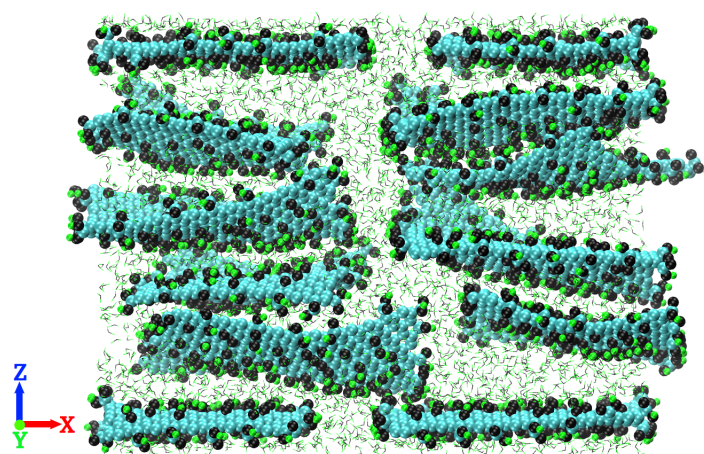

**Fig. S4.** Hydrated layered GO membrane of configuration 8-NP-nIL.

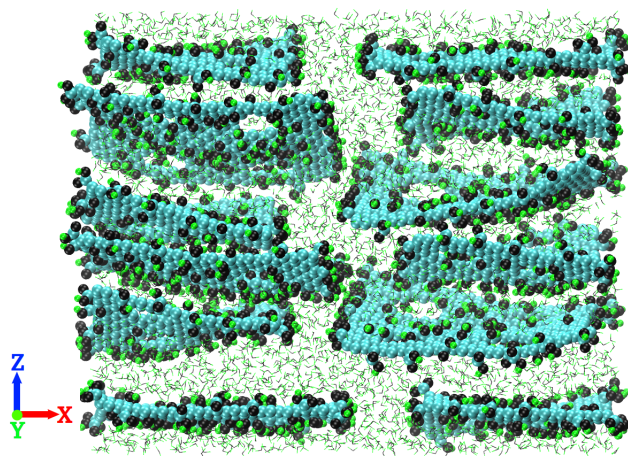

**Fig. S5.** Hydrated layered GO membrane of configuration 8-P-nIL.



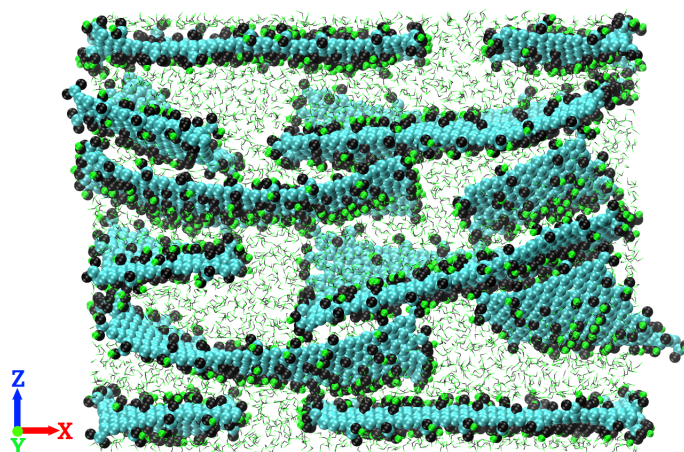

**Fig. S6.** Hydrated layered GO membrane of configuration 24-NP-nIL.

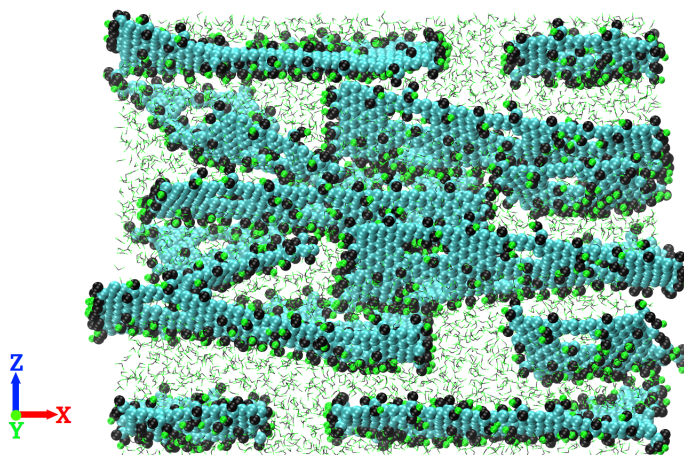

**Fig. S7.** Hydrated layered GO membrane of configuration 24-P-nIL.

# Ion permeation events

Table S1: Ion permeation events through layered GO membranes.

| Membrane  | Ion permeation events |
|-----------|-----------------------|
| 0-NP-IL   | 5                     |
| 0-P-IL    | 8                     |
| 8-NP-IL   | 0                     |
| 8-P-IL    | 3                     |
| 24-NP-IL  | 0                     |
| 24-P-IL   | 0                     |
| 0-NP-nIL  | 5                     |
| 0-P-nIL   | 11                    |
| 8-NP-nIL  | 0                     |
| 8-P-nIL   | 1                     |
| 24-NP-nIL | 0                     |
| 24-P-nIL  | 0                     |

# Trajectory of water molecules through layered GO membranes with non-ideal lamellar stacking

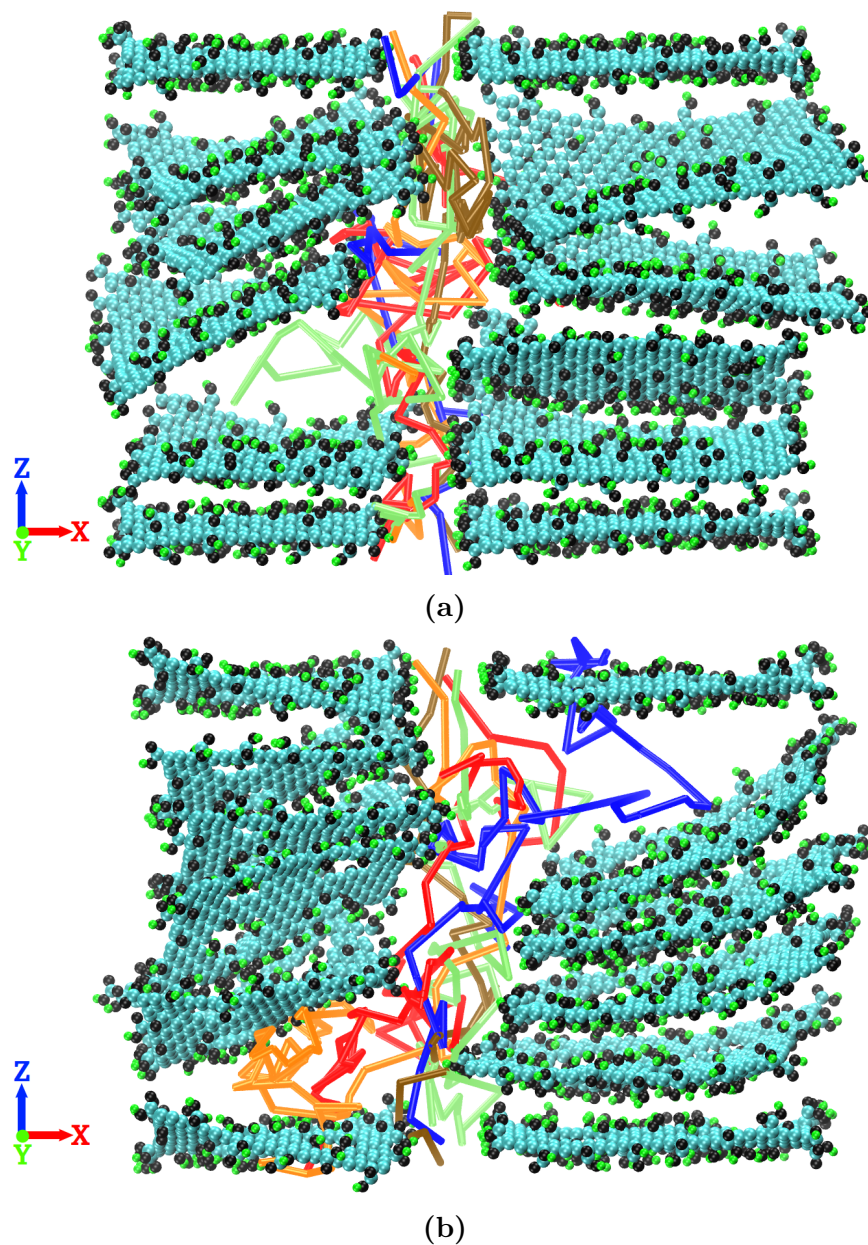

**Fig. S8.** Trajectory of permeating water molecules through layered GO membranes (a) 0-NP-nIL, (b) 0-P-nIL.



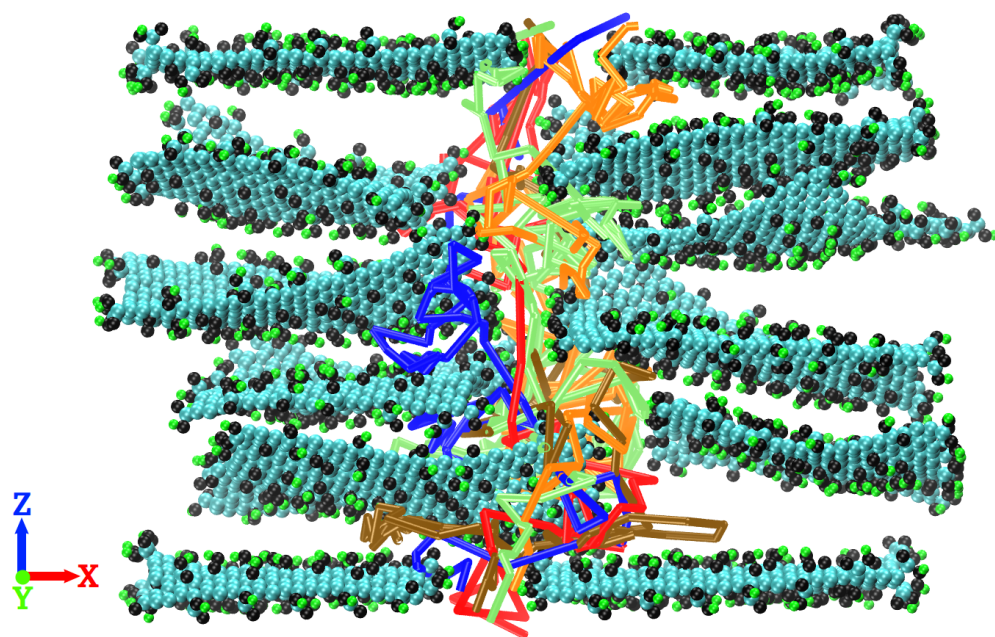

(a)

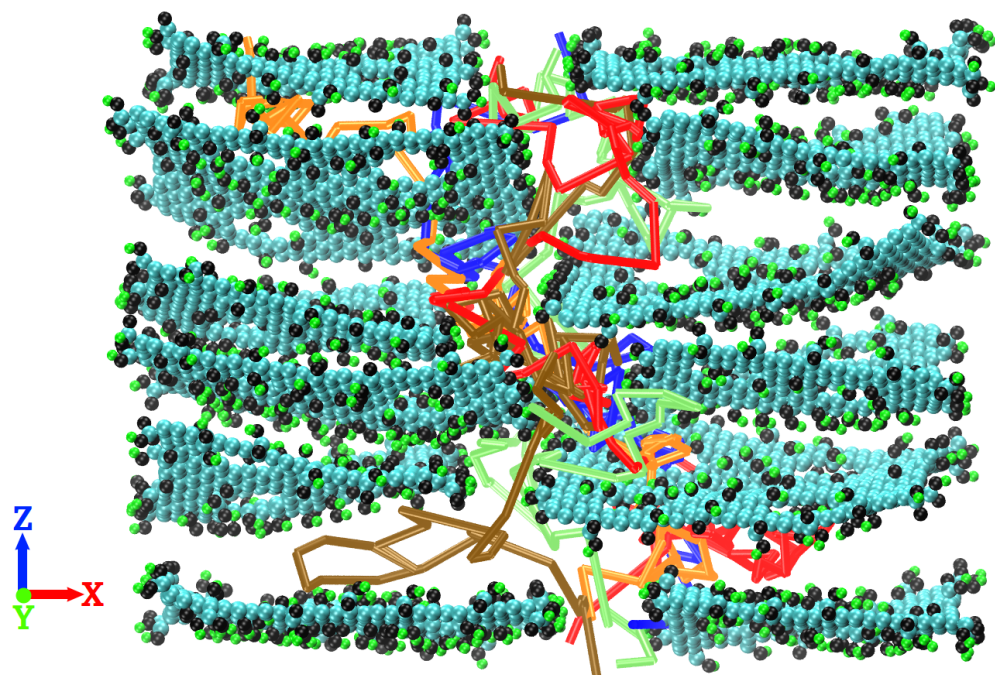

(b)

**Fig. S9.** Trajectory of permeating water molecules through layered GO membranes (a) 8-NP-nIL, (b) 8-P-nIL.



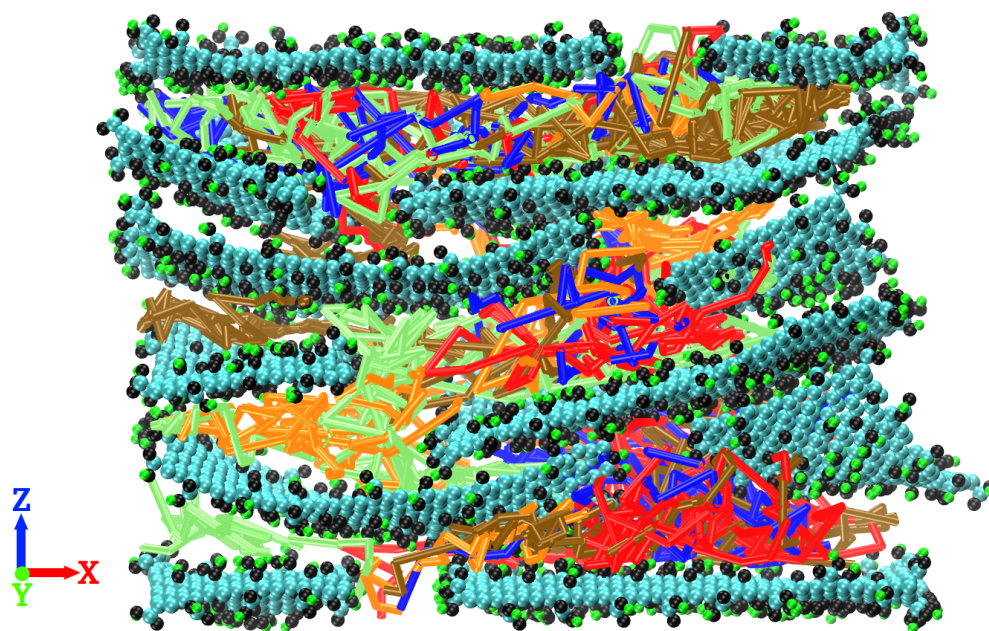

(a)

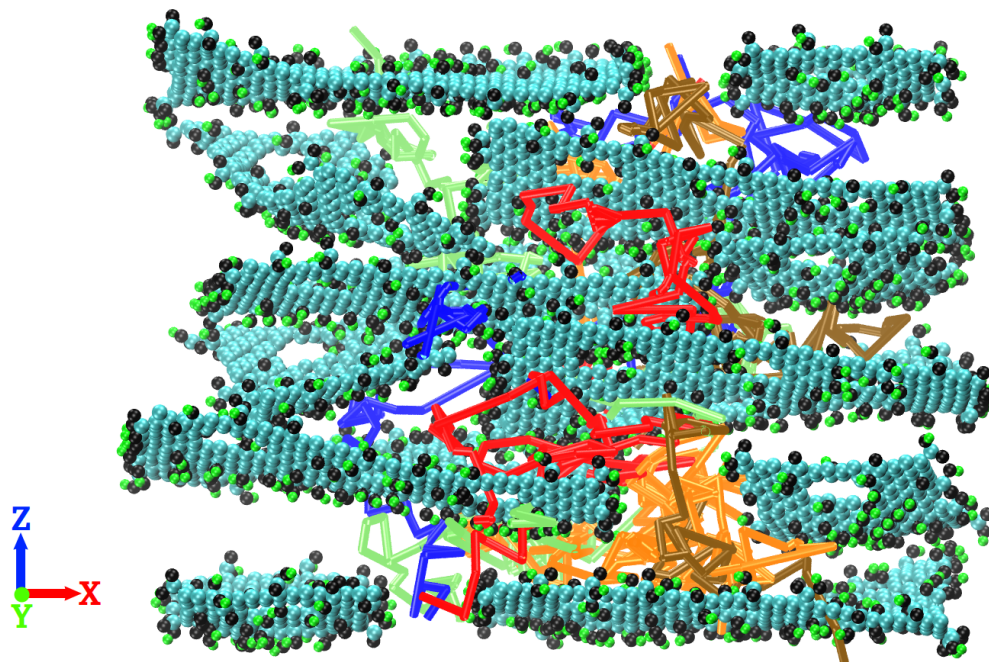

(b)

**Fig. S10.** Trajectory of permeating water molecules through layered GO membranes (a) 24-NP-nIL, (b) 24-P-nIL.

## Trajectory of ions inside the layered GO membranes

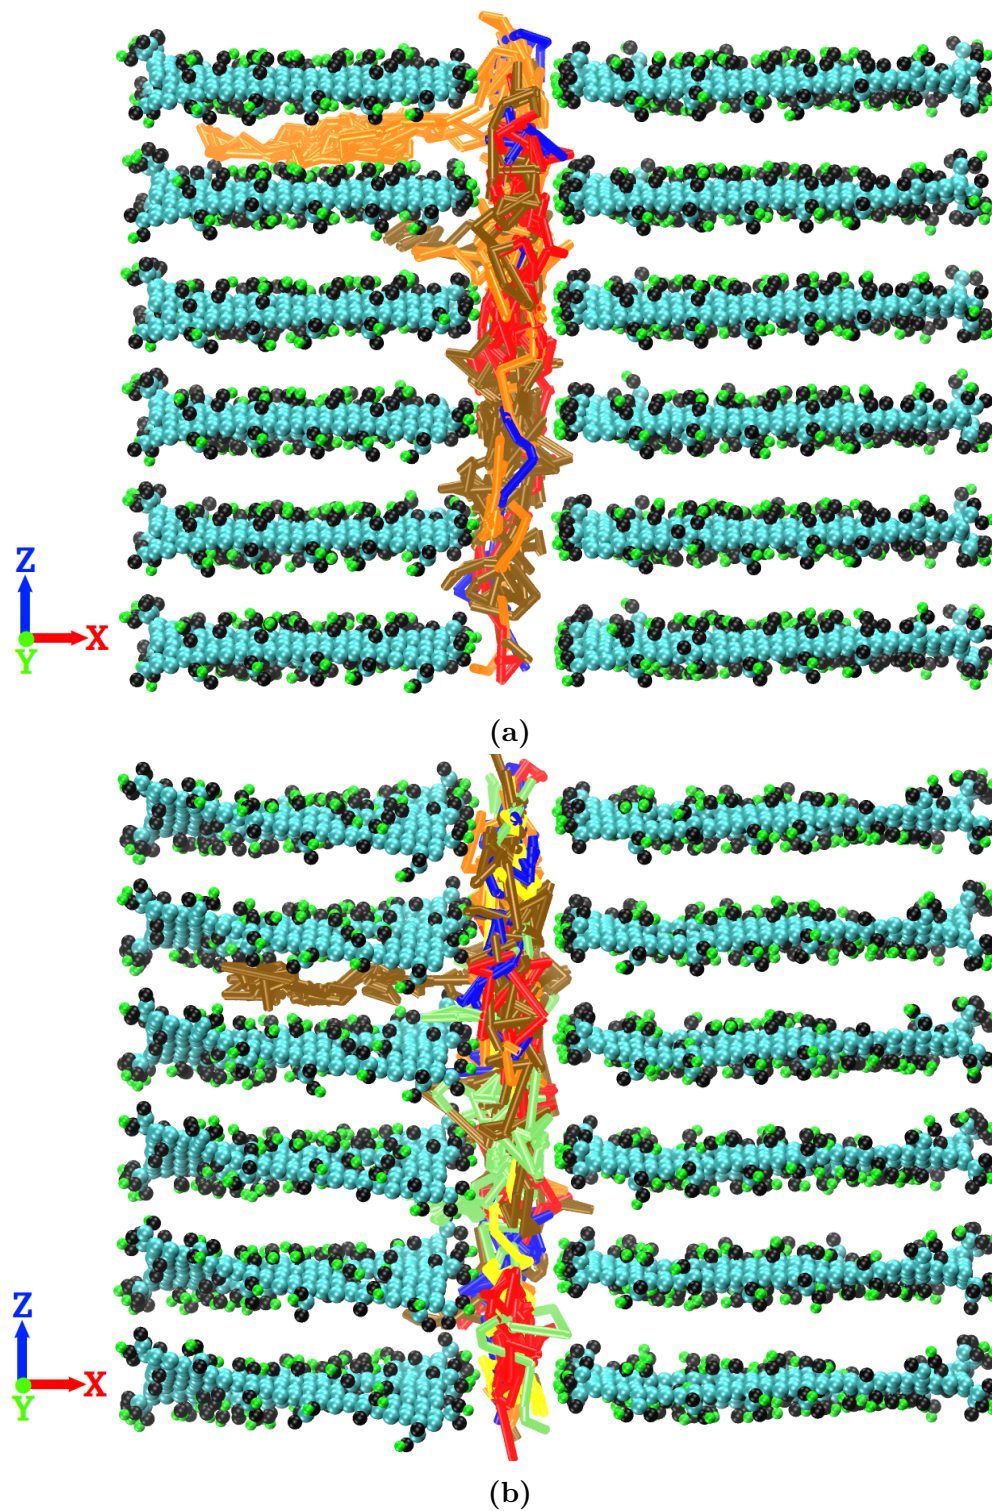

**Fig. S11.** Trajectory of  $\text{Cl}^-$  ions through layered GO membranes (a) 0-NP-IL, (b) 0-P-IL.



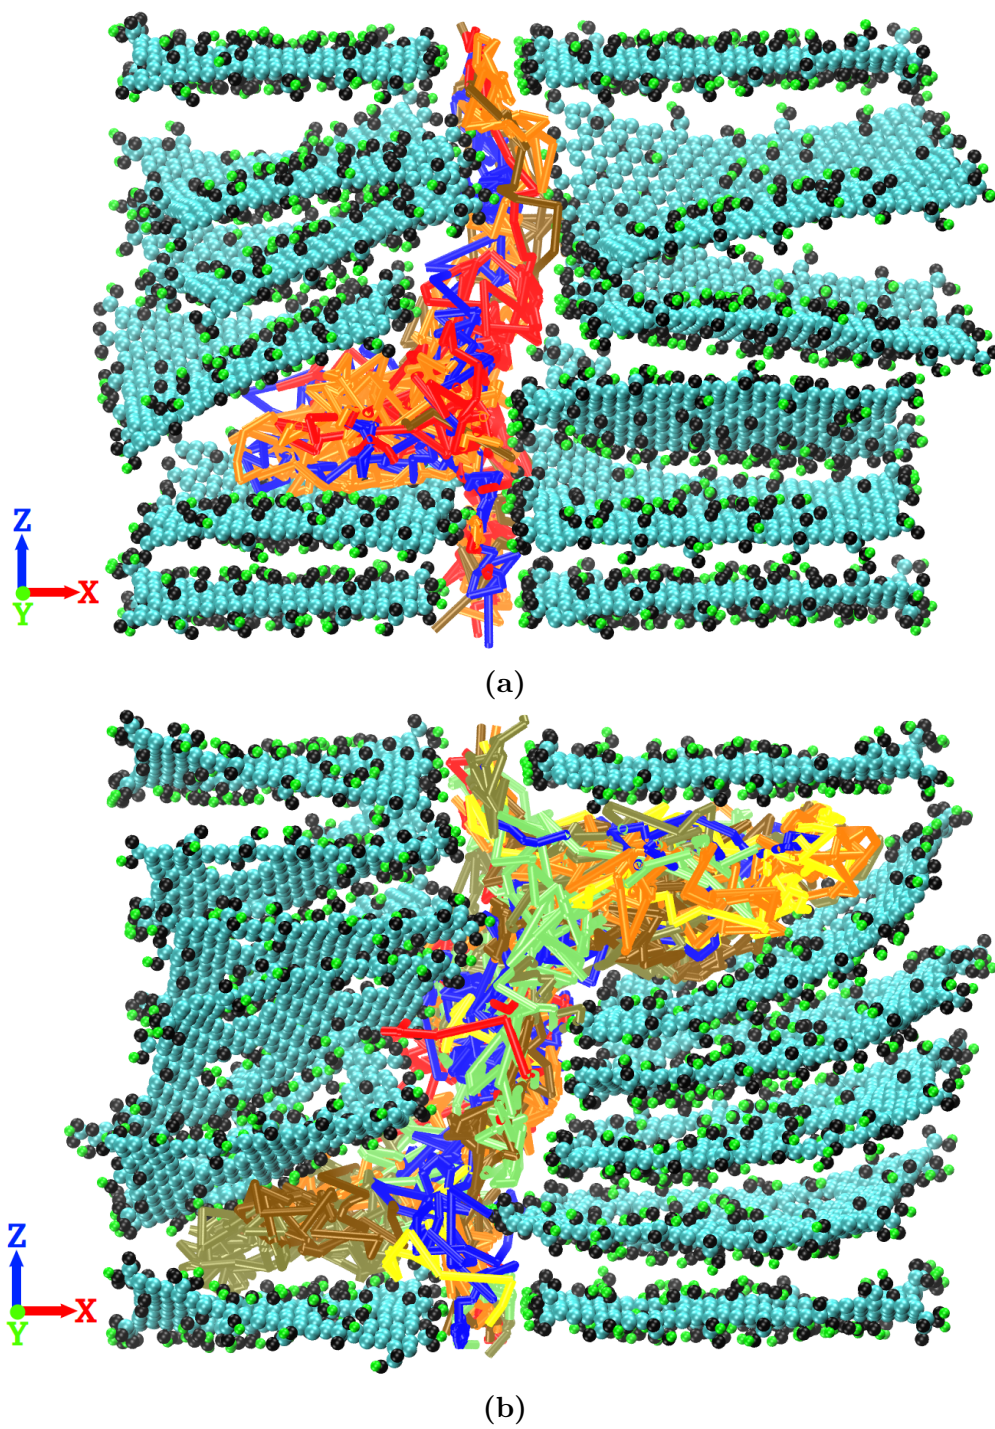

**Fig. S12.** Trajectory of  $\text{Cl}^-$  ions through layered GO membranes (a) 0-NP-nIL, (b) 0-P-nIL.

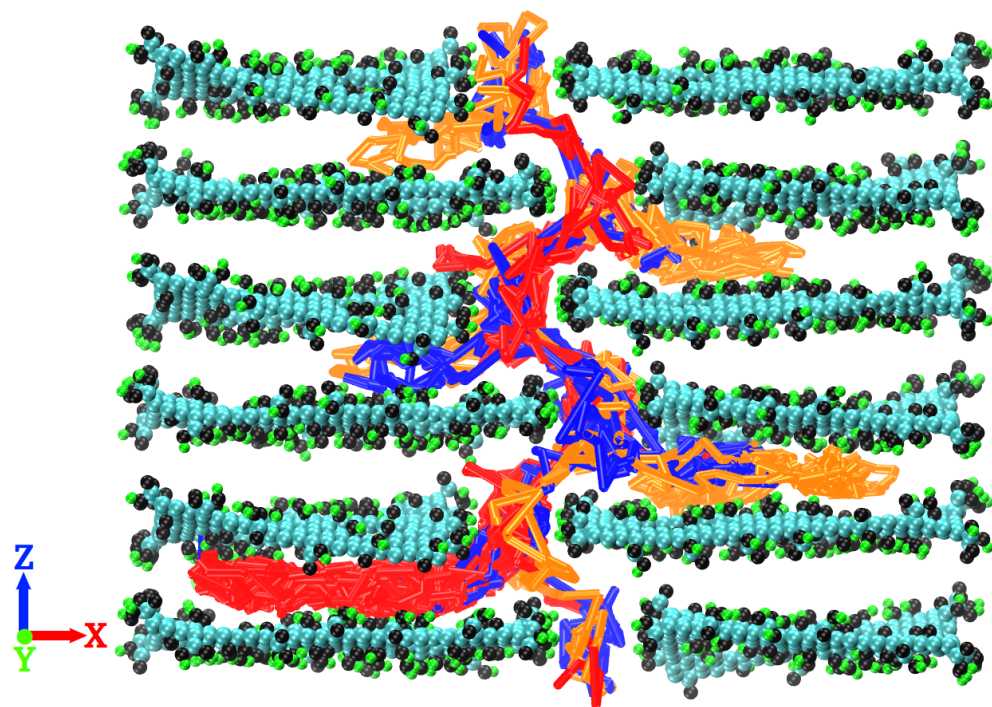

(a)

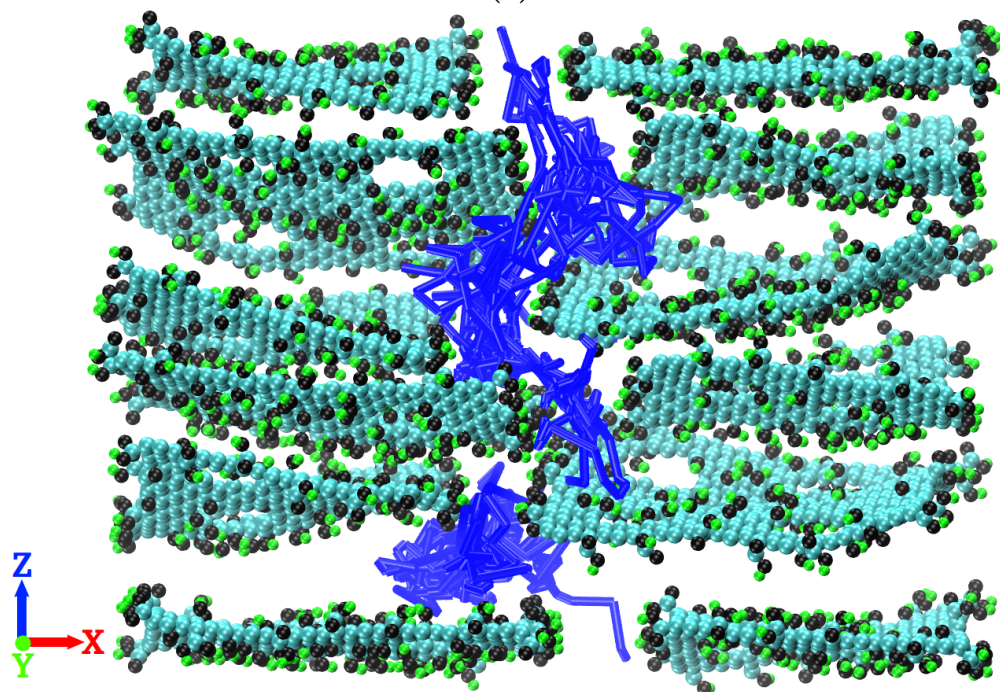

(b)

**Fig. S13.** Trajectory of  $\text{Cl}^-$  ions through layered GO membranes (a) 8-P-IL, (b) 8-P-nIL.



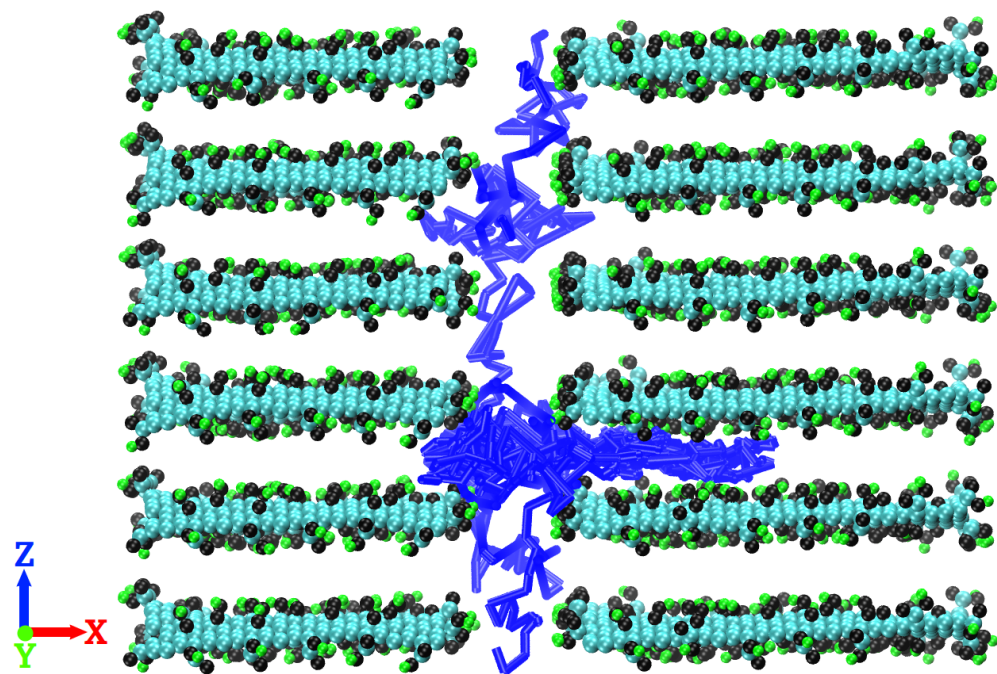

(a)

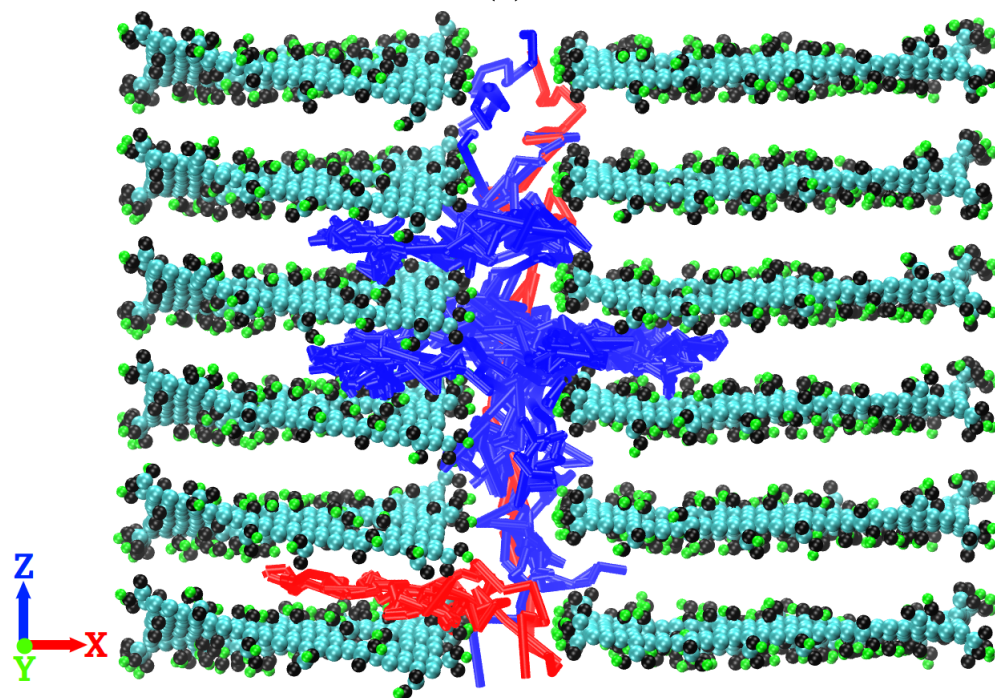

(b)

**Fig. S14.** Trajectory of  $\text{Na}^+$  ions through layered GO membranes (a) 0-NP-IL, (b) 0-P-IL.

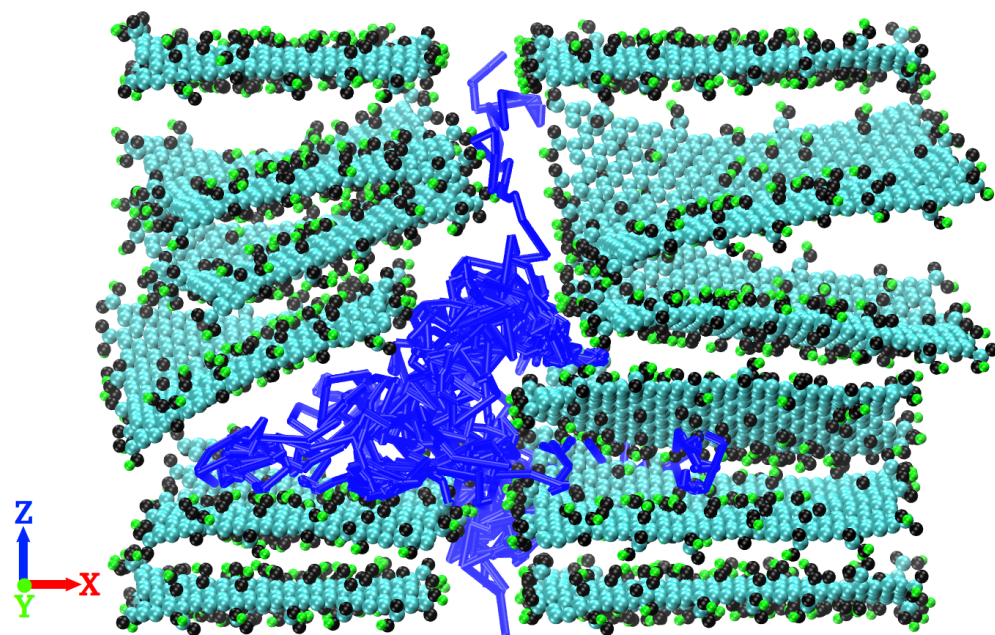

(a)

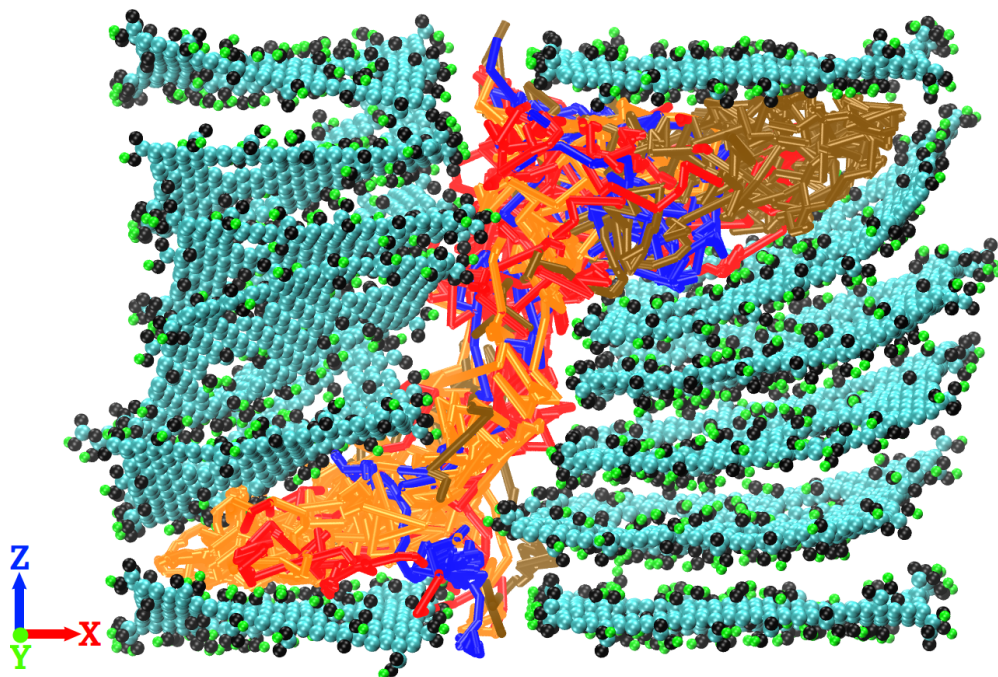

(b)

**Fig. S15.** Trajectory of  $\text{Na}^+$  ions through layered GO membranes (a) 0-NP-nIL, (b) 0-P-nIL.

# Distribution of permeation time and permeation velocity of the water molecules through the layered GO membranes

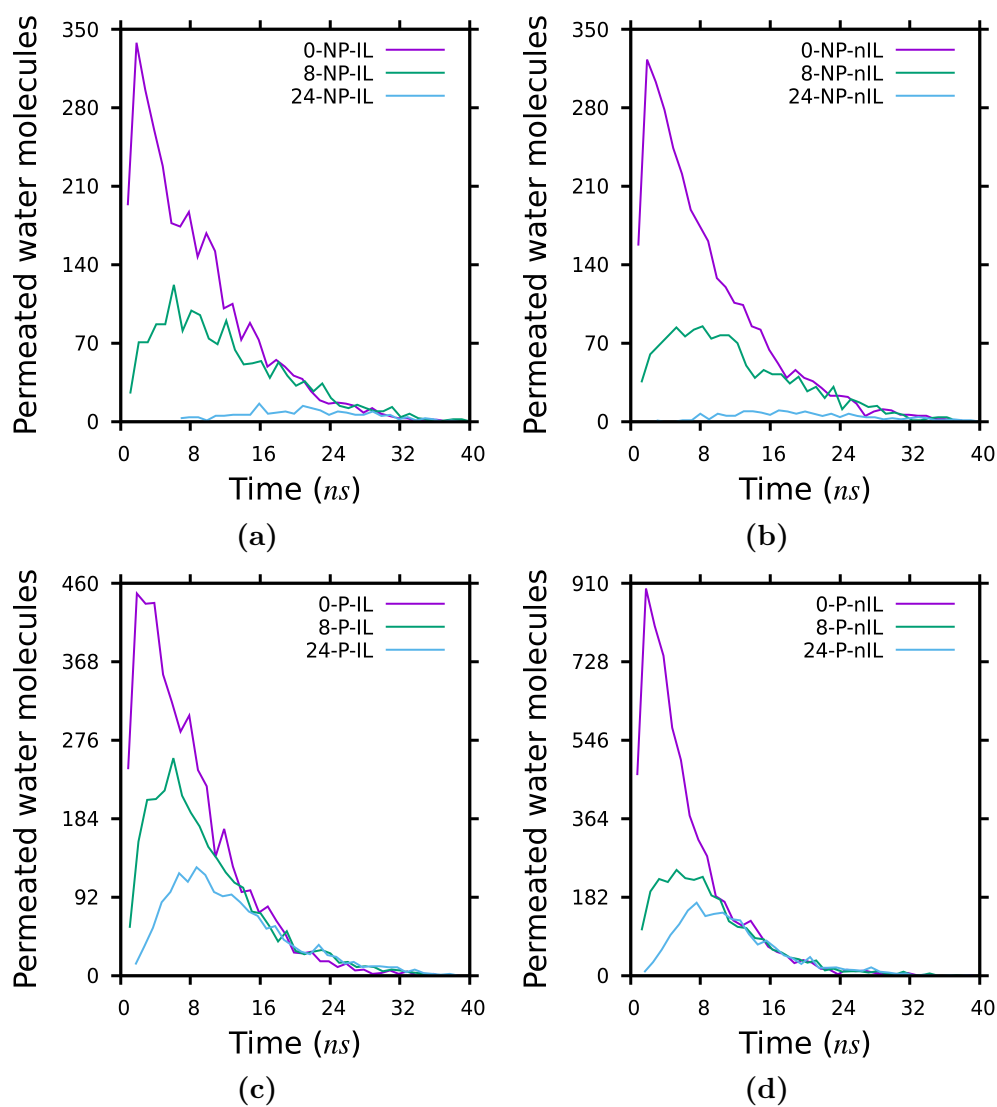

**Fig. S16.** Distribution of permeation time of the water molecules through the layered GO membranes. (a) No pinholes and ideal lamellar stacking. (b) No pinholes and non-ideal lamellar stacking. (c) Pinholes and ideal lamellar stacking. (d) Pinholes and non-ideal lamellar stacking.

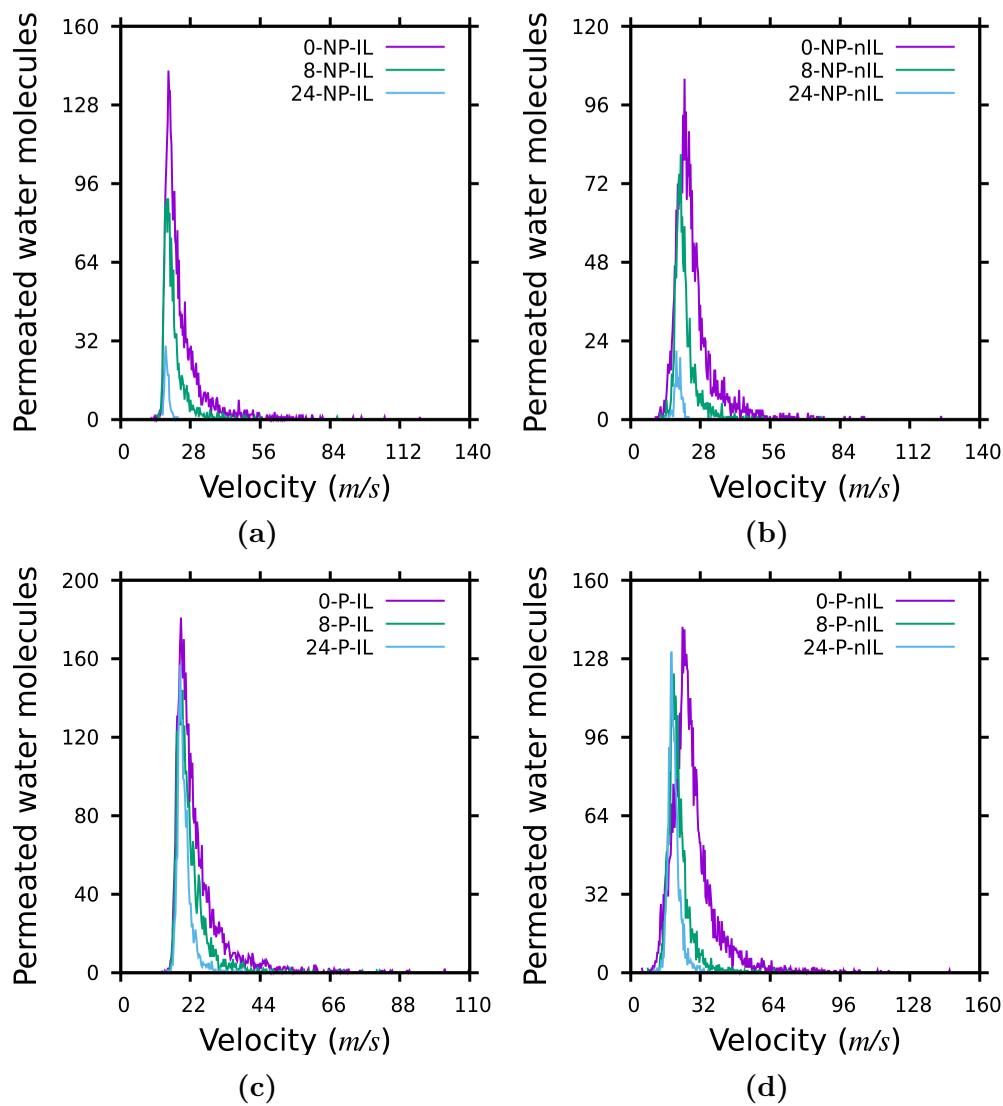

**Fig. S17.** Distribution of permeation velocity of the water molecules through the layered GO membranes. (a) No pinholes and ideal lamellar stacking. (b) No pinholes and non-ideal lamellar stacking. (c) Pinholes and ideal lamellar stacking. (d) Pinholes and non-ideal lamellar stacking.



## Spatial distribution of water

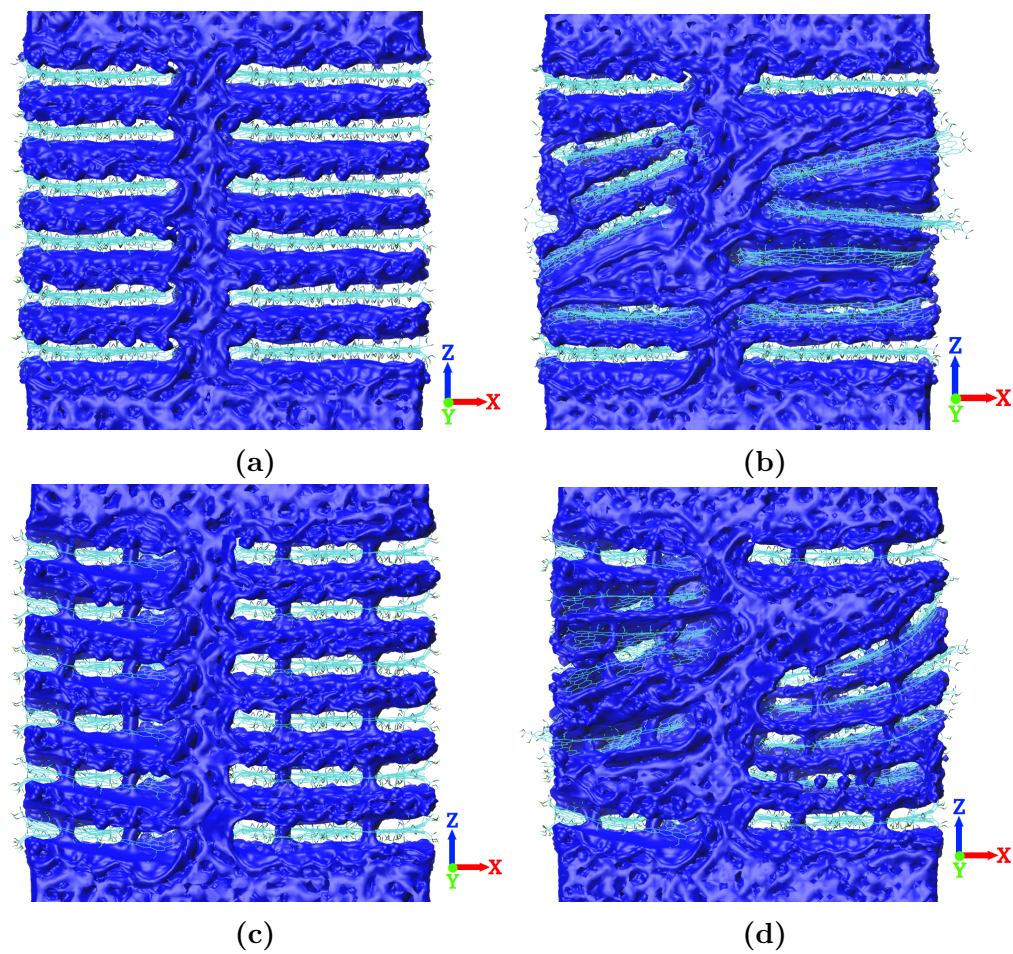

**Fig. S18.** Spatial distribution of water for layered GO membrane with  $\mathbf{W} = 0.0 \text{ \AA}$ . (a) 0-NP-IL. (b) 0-NP-nIL. (c) 0-P-IL. (d) 0-P-nIL.

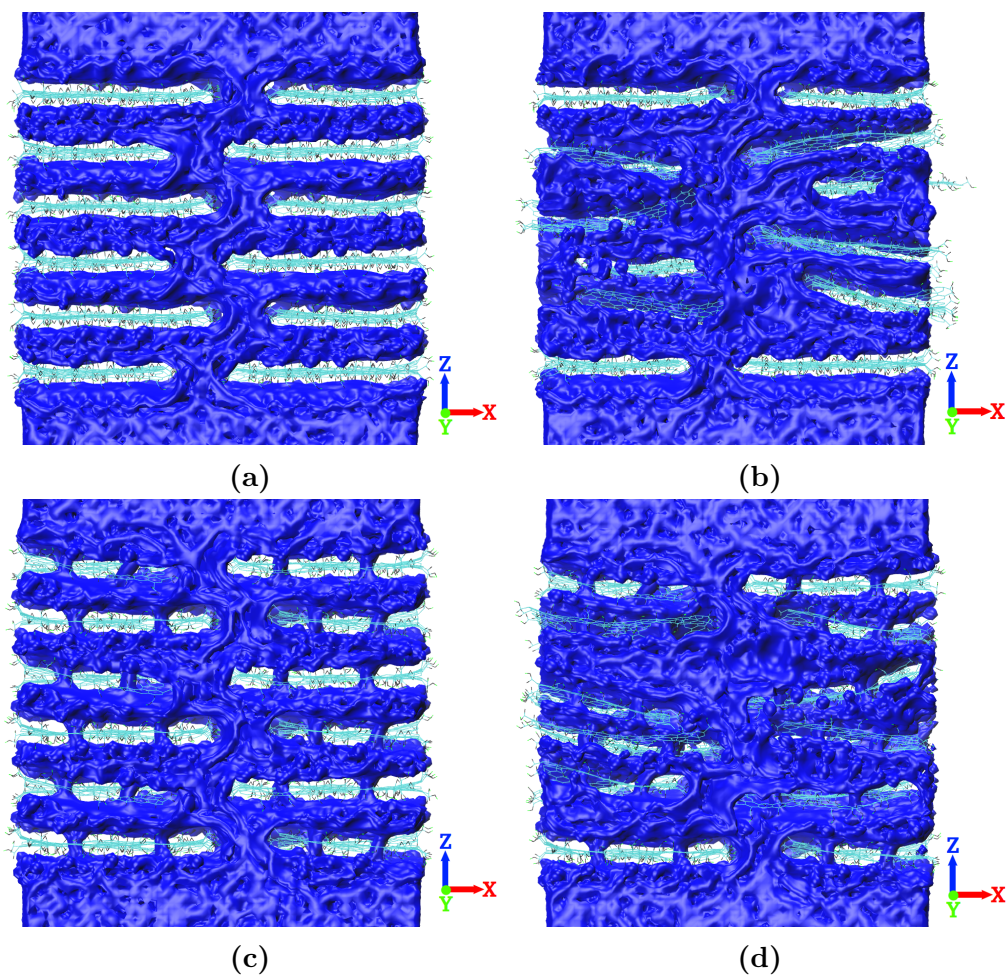

**Fig. S19.** Spatial distribution of water for layered GO membrane with  $W = 8.0 \text{ \AA}$ . (a) 8-NP-IL. (b) 8-NP-nIL. (c) 8-P-IL. (d) 8-P-nIL.

## Variation of water flux with membrane thickness

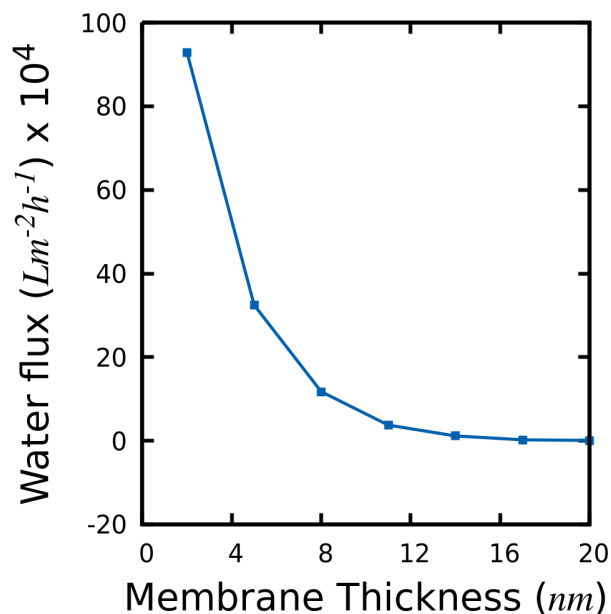

**Fig. S20.** Variation of water flux with the thickness of layered GO membrane (0-NP-IL configuration).

Table S2: Variation of water flux with membrane thickness (0-NP-IL configuration)

| Membrane thickness ( <i>nm</i> ) | Water flux ( $Lm^{-2}h^{-1}$ ) $\times 10^4$ |
|----------------------------------|----------------------------------------------|
| 2.0                              | 92.782                                       |
| 5.0                              | 32.447                                       |
| 8.0                              | 11.747                                       |
| 11.0                             | 3.743                                        |
| 14.0                             | 1.165                                        |
| 17.0                             | 0.237                                        |
| 20.0                             | 0.082                                        |

To get some insight into the effect of membrane thickness on the water flux of layered GO membrane few additional simulations are performed for 0-NP-IL membrane configurations with different membrane thickness. As can be seen from Figure S20 and Table S2 with the increase in thickness the water flux through the layered GO membrane decreases.

# Effect of number of pinhole defects on the performance of layered GO membrane

Table S3: Geometric configurations of the layered GO membrane considered for the study of effect of number of pinhole defects and their corresponding abbreviations

| W (Å) | Geometric configuration of the membrane |                   |                                                   | Membrane abbreviations |
|-------|-----------------------------------------|-------------------|---------------------------------------------------|------------------------|
|       | Pinhole defects                         | Lamellar stacking | Number of pinhole defects on a single layer of GO |                        |
| 0.0   | Yes                                     | Ideal             | 4                                                 | 0-P-IL-4N              |
| 0.0   | Yes                                     | Ideal             | 8                                                 | 0-P-IL-8N              |
| 0.0   | Yes                                     | Ideal             | 12                                                | 0-P-IL-12N             |

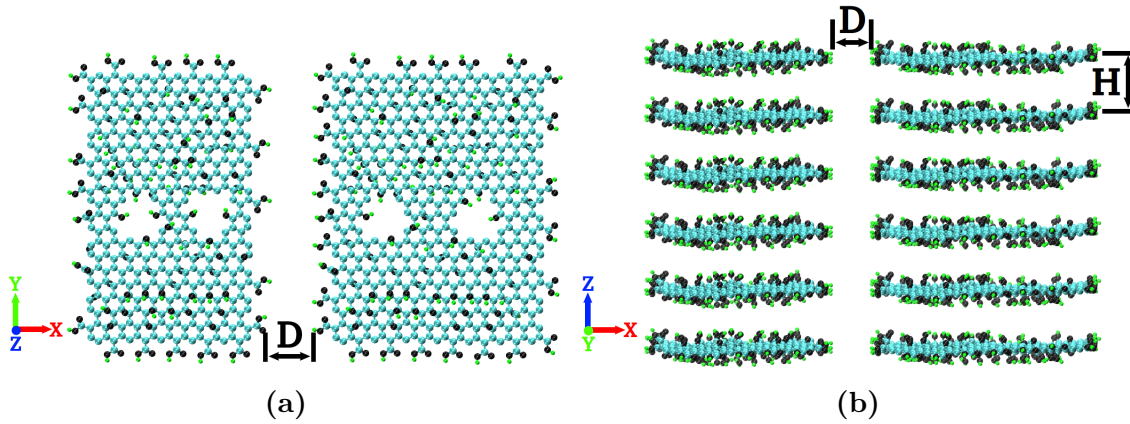

**Fig. S21.** Layered GO membrane with 0-P-IL-4N configuration. (a) Top view. (b) Side view. The green color is for hydrogen atoms, the black color is for oxygen atoms and the cyan color is for carbon atoms.

For investigating the effect of number of pinhole defects on the performance of layered GO membrane three different membrane configurations are considered. These membranes are abbreviated as 0-P-IL-4N, 0-P-IL-8N and 0-P-IL-12N. For 0-P-IL-4N configuration, 4 pinhole defects are considered on a single layer of the GO. Similarly, for 0-P-IL-8N and 0-P-IL-12N configurations 8 and 12 pinhole defects are considered on a single layer of GO respectively. The geometric configuration of these membranes considered for the study of effect of number of pinhole defects and their corresponding membrane abbreviations are shown in Table S3.

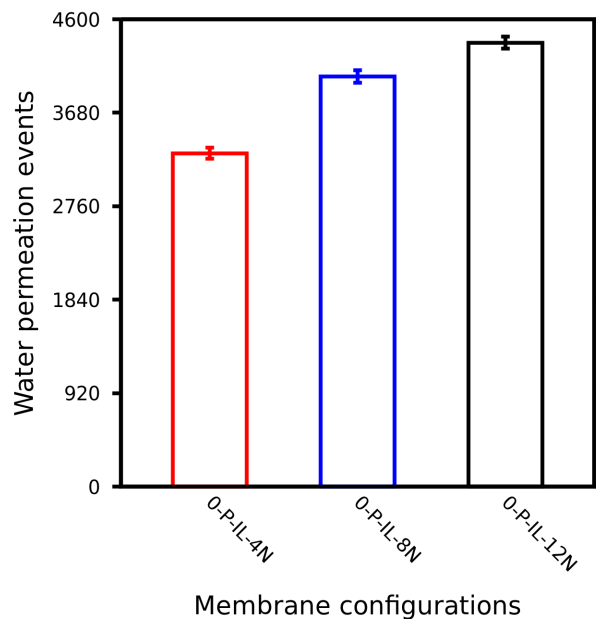

**Fig. S22.** Water permeability through layered GO membranes with different number of pinhole defects.

Figure S21 shows the structure of layered GO membrane with 0-P-IL-4N configuration.

For all these membrane configurations the value of the pore offset distance (**W**) is 0.0 Å and the GO nanosheets layers are perfectly aligned (i.e. they are parallel to each other). Similarly, the value of **D** is 7.0 Å and **H** is 10.0 Å for all these membranes.

The water permeability through the membranes with different number of pinhole defects is shown in Figure S22. As can be seen from Figure S22, with the increase in number of pinhole defects on the layered GO membranes, the water permeability through the membrane increases.



# Effect of pinhole sizes on the performance of layered GO membrane

Table S4: Geometric configurations of the layered GO membrane considered for the study of effect of pinhole sizes and their corresponding abbreviations

| W (Å) | Geometric configuration of the membrane |                   |                                           | Membrane abbreviations |
|-------|-----------------------------------------|-------------------|-------------------------------------------|------------------------|
|       | Pinhole defects                         | Lamellar stacking | Effective diameter of pinhole defects (Å) |                        |
| 0.0   | Yes                                     | Ideal             | 3                                         | 0-P-IL-3S              |
| 0.0   | Yes                                     | Ideal             | 5                                         | 0-P-IL-5S              |
| 0.0   | Yes                                     | Ideal             | 8                                         | 0-P-IL-8S              |

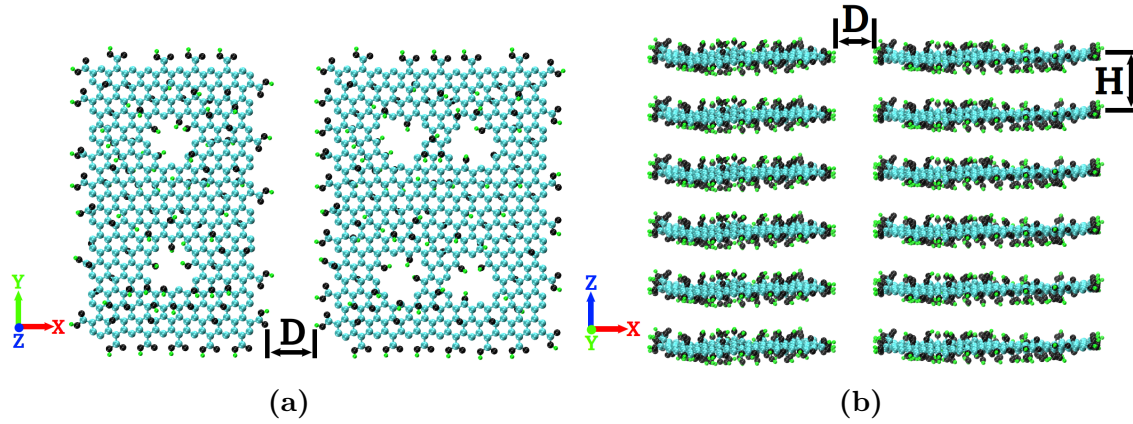

**Fig. S23.** Layered GO membrane with 0-P-IL-5S configuration. (a) Top view. (b) Side view. The green color is for hydrogen atoms, the black color is for oxygen atoms and the cyan color is for carbon atoms.

For investigating the effect of pinhole sizes on the performance of layered GO membrane three different membrane configurations are considered. These membranes are abbreviated as 0-P-IL-3S, 0-P-IL-5S and 0-P-IL-8S. For 0-P-IL-3S membrane configurations the effective diameter of the pinhole defects are 3 Å, for 0-P-IL-5S membrane configuration the effective diameter of the pinhole defects are 5 Å and for 0-P-IL-8S membrane configurations the effective diameter of the pinhole defects are 8 Å. The geometric configurations of the layered GO membranes considered for the study of effect of pinhole sizes and their corresponding

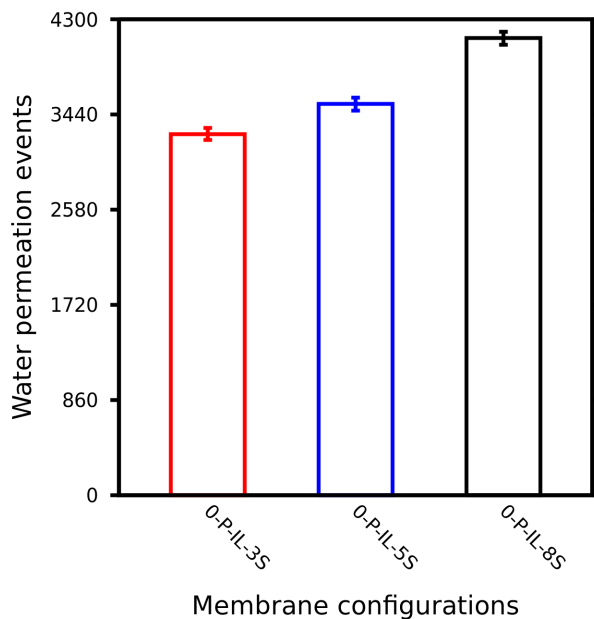

**Fig. S24.** Water permeability through layered GO membranes with different pinhole sizes.

membrane abbreviations are tabulated in Table S4. Figure S23 shows the structure of 0-P-IL-5S membrane configuration.

For all these membranes, there are 6 number of pinhole defects on a single layer of GO. The value of **D** is 7.0 Å and **H** is 10.0 Å for all these membranes. Similarly, the value of pore offset distance (**W**) of these membranes is 0.0 Å and the GO nanosheets of these membranes are perfectly aligned (i.e. parallel to each other).

The water permeability through layered GO membranes with different sizes of pinhole defects is shown in Figure S24. With the increase in sizes of the pinhole defects the water permeability through the layered GO membrane increases.

## References

- (1) Jorgensen, W. L.; Maxwell, D. S.; Rives, J. T. *J. Am. Chem. Soc.* **1996**, *118*, 11225–11236.
